# Supplementary material for: Audience segmentation of New Zealand cat owners: Understanding the barriers and drivers of cat containment behavior
Source: PubMed Central journal article supplement (PMC10781190; doi:10.1371/journal.pone.0296805), 2024-01-10
Supplement: pone.0296805.s004.pdf [file pone.0296805.s004.pdf]

Audience segmentation of New Zealand cat owners: Understanding the barriers and drivers of cat containment behavior  
 --Manuscript Draft--

|                                                                                                                                                                                                                                                                                                                                                                                                                                                                                                     |                                                                                                                                                                                                                                                                                                                                                                                                                                                                                                                                                                                                                                                                                                                                                                                                                                                                                                                                                                                                                                                                                                                                                                                                                                                                                                                                                                                          |
|-----------------------------------------------------------------------------------------------------------------------------------------------------------------------------------------------------------------------------------------------------------------------------------------------------------------------------------------------------------------------------------------------------------------------------------------------------------------------------------------------------|------------------------------------------------------------------------------------------------------------------------------------------------------------------------------------------------------------------------------------------------------------------------------------------------------------------------------------------------------------------------------------------------------------------------------------------------------------------------------------------------------------------------------------------------------------------------------------------------------------------------------------------------------------------------------------------------------------------------------------------------------------------------------------------------------------------------------------------------------------------------------------------------------------------------------------------------------------------------------------------------------------------------------------------------------------------------------------------------------------------------------------------------------------------------------------------------------------------------------------------------------------------------------------------------------------------------------------------------------------------------------------------|
| <b>Manuscript Number:</b>                                                                                                                                                                                                                                                                                                                                                                                                                                                                           | PONE-D-23-20541                                                                                                                                                                                                                                                                                                                                                                                                                                                                                                                                                                                                                                                                                                                                                                                                                                                                                                                                                                                                                                                                                                                                                                                                                                                                                                                                                                          |
| <b>Article Type:</b>                                                                                                                                                                                                                                                                                                                                                                                                                                                                                | Research Article                                                                                                                                                                                                                                                                                                                                                                                                                                                                                                                                                                                                                                                                                                                                                                                                                                                                                                                                                                                                                                                                                                                                                                                                                                                                                                                                                                         |
| <b>Full Title:</b>                                                                                                                                                                                                                                                                                                                                                                                                                                                                                  | Audience segmentation of New Zealand cat owners: Understanding the barriers and drivers of cat containment behavior                                                                                                                                                                                                                                                                                                                                                                                                                                                                                                                                                                                                                                                                                                                                                                                                                                                                                                                                                                                                                                                                                                                                                                                                                                                                      |
| <b>Short Title:</b>                                                                                                                                                                                                                                                                                                                                                                                                                                                                                 | Barriers and drivers of cat containment                                                                                                                                                                                                                                                                                                                                                                                                                                                                                                                                                                                                                                                                                                                                                                                                                                                                                                                                                                                                                                                                                                                                                                                                                                                                                                                                                  |
| <b>Corresponding Author:</b>                                                                                                                                                                                                                                                                                                                                                                                                                                                                        | Sarah A. E. Chamberlain<br>University of Canterbury<br>Christchurch, NEW ZEALAND                                                                                                                                                                                                                                                                                                                                                                                                                                                                                                                                                                                                                                                                                                                                                                                                                                                                                                                                                                                                                                                                                                                                                                                                                                                                                                         |
| <b>Keywords:</b>                                                                                                                                                                                                                                                                                                                                                                                                                                                                                    | domestic cat management; human behavior change; behavior change wheel; intervention design; audience segmentation                                                                                                                                                                                                                                                                                                                                                                                                                                                                                                                                                                                                                                                                                                                                                                                                                                                                                                                                                                                                                                                                                                                                                                                                                                                                        |
| <b>Abstract:</b>                                                                                                                                                                                                                                                                                                                                                                                                                                                                                    | <p>Free-roaming companion cats have a detrimental impact on the environment and are at risk of harm. Despite these negative impacts, it is the norm in New Zealand (NZ) to allow companion cats to roam freely and only a minority of cat owners practice cat containment.</p> <p>This study, using audience segmentation analysis, examined the main barriers and drivers of participation in cat containment for NZ cat owners. A quantitative online cross-sectional survey of 395 NZ cat owners was conducted, measuring containment intentions and behavior, and capability, opportunity, and motivation (COM) to perform cat containment. Results from bivariate correlations and multiple regression demonstrated that the COM factors predicted increased cat containment intentions and behavior. Latent profile analysis identified four distinct segments of cat owners with unique COM profiles; engaged (6%), receptive (17%), ambivalent (48%), and opposed (30%). Validation analysis demonstrated that these groups all differed significantly in their cat containment intentions and behaviors. From these findings theoretically grounded behavior change interventions can be developed to target the causes of non-participation in cat containment for each of the identified cat owner segments, thereby improving the management of free-roaming cats in NZ.</p> |
| <b>Order of Authors:</b>                                                                                                                                                                                                                                                                                                                                                                                                                                                                            | <p>Sarah A. E. Chamberlain</p> <p>Lynette J. McLeod</p> <p>Donald W. Hine</p>                                                                                                                                                                                                                                                                                                                                                                                                                                                                                                                                                                                                                                                                                                                                                                                                                                                                                                                                                                                                                                                                                                                                                                                                                                                                                                            |
| <b>Additional Information:</b>                                                                                                                                                                                                                                                                                                                                                                                                                                                                      |                                                                                                                                                                                                                                                                                                                                                                                                                                                                                                                                                                                                                                                                                                                                                                                                                                                                                                                                                                                                                                                                                                                                                                                                                                                                                                                                                                                          |
| <b>Question</b>                                                                                                                                                                                                                                                                                                                                                                                                                                                                                     | <b>Response</b>                                                                                                                                                                                                                                                                                                                                                                                                                                                                                                                                                                                                                                                                                                                                                                                                                                                                                                                                                                                                                                                                                                                                                                                                                                                                                                                                                                          |
| <p><b>Financial Disclosure</b></p> <p>Enter a financial disclosure statement that describes the sources of funding for the work included in this submission. Review the <a href="#">submission guidelines</a> for detailed requirements. View published research articles from <a href="#">PLOS ONE</a> for specific examples.</p> <p>This statement is required for submission and <b>will appear in the published article</b> if the submission is accepted. Please make sure it is accurate.</p> | <p>The authors received no specific funding for this work.</p>                                                                                                                                                                                                                                                                                                                                                                                                                                                                                                                                                                                                                                                                                                                                                                                                                                                                                                                                                                                                                                                                                                                                                                                                                                                                                                                           |

**Unfunded studies**

Enter: *The author(s) received no specific funding for this work.*

**Funded studies**

Enter a statement with the following details:

- Initials of the authors who received each award
- Grant numbers awarded to each author
- The full name of each funder
- URL of each funder website
- Did the sponsors or funders play any role in the study design, data collection and analysis, decision to publish, or preparation of the manuscript?
- **NO** - Include this sentence at the end of your statement: *The funders had no role in study design, data collection and analysis, decision to publish, or preparation of the manuscript.*
- **YES** - Specify the role(s) played.

\* typeset

**Competing Interests**

Use the instructions below to enter a competing interest statement for this submission. On behalf of all authors, disclose any [competing interests](#) that could be perceived to bias this work—acknowledging all financial support and any other relevant financial or non-financial competing interests.

This statement is **required** for submission and **will appear in the published article** if the submission is accepted. Please make sure it is accurate and that any funding sources listed in your Funding Information later in the submission form are also declared in your Financial Disclosure statement.

View published research articles from [PLOS ONE](#) for specific examples.

The authors have declared that no competing interests exist.

**NO authors have competing interests**

Enter: *The authors have declared that no competing interests exist.*

**Authors with competing interests**

Enter competing interest details beginning with this statement:

*I have read the journal's policy and the authors of this manuscript have the following competing interests: [insert competing interests here]*

\* typeset

**Ethics Statement**

Enter an ethics statement for this submission. This statement is required if the study involved:

- Human participants
- Human specimens or tissue
- Vertebrate animals or cephalopods
- Vertebrate embryos or tissues
- Field research

Write "N/A" if the submission does not require an ethics statement.

General guidance is provided below. Consult the [submission guidelines](#) for detailed instructions. **Make sure that all information entered here is included in the Methods section of the manuscript.**

The study received blanket ethics approval from the Human Ethics Committee of the University of Canterbury.

Participants' informed written consent was obtained.

**Format for specific study types**

**Human Subject Research (involving human participants and/or tissue)**

- Give the name of the institutional review board or ethics committee that approved the study
- Include the approval number and/or a statement indicating approval of this research
- Indicate the form of consent obtained (written/oral) or the reason that consent was not obtained (e.g. the data were analyzed anonymously)

**Animal Research (involving vertebrate animals, embryos or tissues)**

- Provide the name of the Institutional Animal Care and Use Committee (IACUC) or other relevant ethics board that reviewed the study protocol, and indicate whether they approved this research or granted a formal waiver of ethical approval
- Include an approval number if one was obtained
- If the study involved *non-human primates*, add *additional details* about animal welfare and steps taken to ameliorate suffering
- If anesthesia, euthanasia, or any kind of animal sacrifice is part of the study, include briefly which substances and/or methods were applied

**Field Research**

Include the following details if this study involves the collection of plant, animal, or other materials from a natural setting:

- Field permit number
- Name of the institution or relevant body that granted permission

**Data Availability**

Authors are required to make all data underlying the findings described fully available, without restriction, and from the time of publication. PLOS allows rare exceptions to address legal and ethical concerns. See the [PLOS Data Policy](#) and [FAQ](#) for detailed information.

Yes - all data are fully available without restriction

A Data Availability Statement describing where the data can be found is required at submission. Your answers to this question constitute the Data Availability Statement and **will be published in the article**, if accepted.

**Important:** Stating 'data available on request from the author' is not sufficient. If your data are only available upon request, select 'No' for the first question and explain your exceptional situation in the text box.

Do the authors confirm that all data underlying the findings described in their manuscript are fully available without restriction?

**Describe where the data may be found in full sentences. If you are copying our sample text, replace any instances of XXX with the appropriate details.**

- If the data are **held or will be held in a public repository**, include URLs, accession numbers or DOIs. If this information will only be available after acceptance, indicate this by ticking the box below. For example: *All XXX files are available from the XXX database (accession number(s) XXX, XXX).*
- If the data are all contained **within the manuscript and/or Supporting Information files**, enter the following: *All relevant data are within the manuscript and its Supporting Information files.*
- If neither of these applies but you are able to provide **details of access elsewhere**, with or without limitations, please do so. For example:

*Data cannot be shared publicly because of [XXX]. Data are available from the XXX Institutional Data Access / Ethics Committee (contact via XXX) for researchers who meet the criteria for access to confidential data.*

*The data underlying the results presented in the study are available from (include the name of the third party*

The data file is available from the Mendeley database (DOI: 10.17632/hytxh9bm8c.1)

*and contact information or URL).*

- This text is appropriate if the data are owned by a third party and authors do not have permission to share the data.

\* typeset

Additional data availability information:

1

2

3

4 **Audience segmentation of New Zealand cat owners: Understanding the barriers and**  
5 **drivers of cat containment behavior**

6

7 Sarah A. E. Chamberlain<sup>1</sup>, Lynette J. McLeod<sup>1</sup> and Donald W. Hine<sup>1\*</sup>

8

9

10

11

12

13 <sup>1</sup>School of Psychology, Speech, and Hearing, University of Canterbury, Christchurch, New

14 Zealand

15

16

17

18 Sarah A. E. Chamberlain  <https://orcid.org/0000-0002-0060-8046>

19 Lynette J. McLeod  <https://orcid.org/0000-0001-9408-3342>

20 Donald W. Hine  <https://orcid.org/0000-0002-3905-7026>

21 We have no conflicts of interest to disclose.

22

23 \* Corresponding author

24 E-mail: [donald.hine@canterbury.ac.nz](mailto:donald.hine@canterbury.ac.nz) (DWH)

25

## 26 **Abstract**

27 Free-roaming companion cats have a detrimental impact on the environment and are at risk of  
28 harm. Despite these negative impacts, it is the norm in New Zealand (NZ) to allow  
29 companion cats to roam freely and only a minority of cat owners practice cat containment.  
30 This study, using audience segmentation analysis, examined the main barriers and drivers of  
31 participation in cat containment for NZ cat owners. A quantitative online cross-sectional  
32 survey of 395 NZ cat owners was conducted, measuring containment intentions and behavior,  
33 and capability, opportunity, and motivation (COM) to perform cat containment. Results from  
34 bivariate correlations and multiple regression demonstrated that the COM factors predicted  
35 increased cat containment intentions and behavior. Latent profile analysis identified four  
36 distinct segments of cat owners with unique COM profiles; *engaged* (6%), *receptive* (17%),  
37 *ambivalent* (48%), and *opposed* (30%). Validation analysis demonstrated that these groups all  
38 differed significantly in their cat containment intentions and behaviors. From these findings  
39 theoretically grounded behavior change interventions can be developed to target the causes of  
40 non-participation in cat containment for each of the identified cat owner segments, thereby  
41 improving the management of free-roaming cats in NZ.

42 *Keywords:* domestic cat management, human behavior change, behavior change  
43 wheel, intervention design, audience segmentation

44

45

46

47

48

49

50



## 51 **Introduction**

52           The cat is New Zealand's (NZ) most popular companion animal with an estimated  
53 population of 1.2 million [1, 2]. Companion cats in NZ are defined as common domestic cats  
54 that reside with humans and depend on them for their welfare [2]. Most owners choose to  
55 have a companion cat because of the friendship, love, and affection they offer. The negative  
56 effect companion cats have on the environment is, however, often overlooked. Free-roaming  
57 cats are considered to have several negative environmental impacts [3, 4], with one of the  
58 most notable being wildlife predation [5-10]. In addition, free-roaming cats are implicated in  
59 other less understood ecological effects, such as disease transmission and behavioral changes  
60 (e.g., breeding behavior, parental care, and stress induction) [11]. The spread of  
61 *toxoplasmosis gondii* by cats is of particular concern [4] as it poses a risk to humans [12] and  
62 marine mammals such as endangered Māui and Hector's dolphins in NZ [13]. The welfare of  
63 free-roaming cats is also at risk due to their increased likelihood of injury and death [4, 5, 9].  
64 As such, there is a clear need for cat owners to manage their cat's roaming behavior, for both  
65 environmental and cat welfare reasons.

## 66 **Cat management behaviors**

67           Cat containment is one of several cat management behaviors owners can engage in to  
68 reduce their cat's environmental impact and the likelihood of roaming-related accidents [14,  
69 15]. It includes a variety of behaviors and ranges from keeping a cat indoors at all times and  
70 providing controlled outdoor access (e.g., limiting a cat to an escape-proof fenced yard, an  
71 enclosure / run, or walks on a harness and lead), to keeping a cat indoors for a period of time  
72 (e.g., overnight) [4, 14]. Cat containment is, however, a novel practice in NZ, with research  
73 finding that less than 14% of NZ owners kept their cat indoors or on their property at all  
74 times and only 14-29% inside overnight [14, 16]. Interestingly, the performance of cat  
75 containment has been found to vary significantly by country and region [16, 17]. According

76 to Hall et al., [16], approximately two thirds of owners in NZ (67%) and the United Kingdom  
77 (UK; 64%) let their cat roam freely, while owners in Australia (80-92%) and the United  
78 States (80-93%) commonly performed some form of cat containment (indoors overnight,  
79 controlled outdoor access, or indoors at all times), and in Japan most kept their cat indoors  
80 (75%).

## 81 **Behavior change interventions**

82 To improve cat management practices in NZ, evidence-based interventions may be  
83 necessary to change cat owner's behavior. Interestingly, McLeod et al., [18] who conducted  
84 an audit of the cat management interventions employed by organizations internationally,  
85 found that many effective behavior change techniques were under-utilized. They found that  
86 most organizations relied on inappropriate techniques, such as logical, evidenced-based  
87 messaging, and discussed that the application of behavior change theory would allow for  
88 more effective interventions to be developed. It has been suggested that theory-based  
89 behavior change interventions to address animal management issues should follow these four  
90 key steps: 1) select a human behavior to target which has the greatest potential to address the  
91 issue, 2) determine the barriers and drivers underlying non-participation in the prioritized  
92 behavior, 3) develop interventions that directly address the barriers and drivers to increase  
93 engagement in the behavior, and 4) evaluate the effectiveness of the intervention in  
94 promoting behavior change [19, 20]. For the issue of free-roaming companion cats in NZ,  
95 Linklater et al., [14] conducted the first step by applying the McKenzie-Mohr behavior  
96 prioritization framework [21]. They considered the beneficial impact of various behaviors,  
97 their likelihood of adoption among owners, the proportion of owners already performing  
98 them, and veterinarians' opinions. Of the behaviors investigated they found that cat  
99 containment was the most effective behavior to target and promote among NZ cat owners  
100 (particularly keeping cats on the property always and overnight). With cat containment

101 supported as the best behavior to target, the next step is to understand the barriers and drivers  
102 of cat containment, which can then help to design interventions to increase participation in  
103 this behavior in NZ [19, 20].

#### 104 **The COM-B model of behavior and audience segmentation**

105 **A broad range of domains have applied the COM-B model** [22] to understand the  
106 barriers and drivers of behavior related to health [23-29], pro-environmental behavior [30-  
107 32], agriculture [33, 34], and invasive animal management [35-37]. According to COM-B,  
108 behavior is the result of three main factors: capability, opportunity, and motivation (COM)  
109 [22]. Capability is a person's psychological and physical capacity to perform a behavior. It  
110 includes factors such as skills, awareness, knowledge, and confidence in one's ability to  
111 perform a behavior. Opportunity is comprised of physical and social opportunity and are  
112 external factors that enable a behavior to be performed. Physical opportunity includes having  
113 the necessary time, environmental and financial circumstances, and access to resources  
114 required to perform a behavior. Social Opportunity includes social norms and influences that  
115 make performance of a behavior more or less likely. Motivation includes internal factors that  
116 direct a behavior. It comprises reflective motivation (the conscious beliefs, attitudes, and  
117 goals which inform decision making) and automatic motivation (the emotional associations,  
118 habits, and impulses that subtly direct behavior). COM-B can be an overarching framework  
119 that integrates behavioral determinants specified by different behavioral theories relevant to  
120 invasive animal management (e.g., theory of planned behavior, health belief model,  
121 protection motivation theory) [38]. An additional strength of this model is that it sits within  
122 the Behavior Change Wheel (BCW). The BCW links each COM component with appropriate  
123 interventions to address it and thereby modify behavior [22]. For instance, according to the  
124 BCW, if non-participation in a desired behavior is the result of low physical capability,

125 techniques such as training or enablement are recommended to increase physical capability  
126 and thereby change behavior.

127 Audience segmentation analysis can also be conducted to develop an in-depth  
128 understanding of the barriers and drivers of cat containment [19, 20]. Audience segmentation  
129 allows for the determination of whether a population is a single audience with the same set of  
130 factors impacting behavior, or whether multiple segments exist, each with a different set of  
131 factors influencing behavior [19, 20, 39]. While this is an approach commonly used by  
132 marketers, it has also been utilized in the context of climate change communications [40-42],  
133 pro-environmental behavior [43, 44], health [45], and invasive animal management [35-37,  
134 46]. Previous research on invasive animal management has demonstrated that populations are  
135 not homogenous, with multiple segments identified that varied in their level of support for a  
136 desired behavior [36, 37, 46]. Identifying unique audiences can help to decide which  
137 segments to target for behavior change and whether interventions should be tailored to suit  
138 the characteristics of each audience [19, 20].

### 139 **Identifying the barriers and drivers of cat containment behavior**

140 Preliminary research has sought to identify the barriers and drivers of owners' cat  
141 containment behavior and to determine whether there are distinct audiences of cat owners. In  
142 the NZ context, MacDonald et al., [47] applied the theory of planned behavior (TPB) to  
143 understand the influences on owners' intentions to keep their cat inside at night. They found  
144 that 31% of owners contained their cat at night and that the most influential predictors of  
145 night-containment intentions were attitudes, particularly the belief that night-containment is  
146 beneficial for the cat. They also found that household members and veterinarians influenced  
147 through injunctive norms night-containment intentions and that other cat owners' lack of  
148 engagement in night-containment predicted non-night-containment intentions. These findings  
149 suggest that attitudes and norms may be drivers of night-containment behavior.

150 International research offers additional insight into the influences on cat containment  
151 behavior and the types of audience segments that may exist in NZ. Firstly, Tan et al., [17]  
152 found that perceived benefits and risk of roaming were related to allowing cats to free roam.  
153 In addition, demographics and cat characteristics were related to cat containment behavior,  
154 which was also demonstrated by an international study [48]. In the AU context van Eeden et  
155 al., [49] applied the TPB and found that 83% of cat owners surveyed in the state of Victoria  
156 performed cat containment (30% indoors overnight, 53% controlled outdoor access or  
157 indoors at all times). The most important predictors of this behavior included perceived  
158 ability to perform cat containment and beliefs (concerns about cat safety, cats' right to roam,  
159 and cat predation behavior). In the UK, Crowley et al., [46] identified five distinct cat owner  
160 segments based on their beliefs, attitudes, and emotional reactions related to their cat's  
161 roaming and predation behavior. Their findings suggested that a key motivator to perform cat  
162 containment for some groups was cat welfare, while for others it was reducing predation of  
163 wildlife. Lastly, McLeod et al., [35] found that owners surveyed in AU can be segmented into  
164 four distinct audiences based on their cat containment behavior, and that the majority  
165 contained their cat at all times or overnight (65%). Owners who *always* contained their cat  
166 (33%) were more confident in their ability to perform containment, had more positive  
167 attitudes towards the benefit of cat containment, and were more likely to contain their cat if it  
168 was compulsory (**injunctive social norm**), compared to those who only had a *night curfew* for  
169 their cat (32%), *sporadically* (29%), or *never* (6%) contained their cat.

170 Overall, previous research [17, 35, 46, 47, 49] supports that COM factors such as  
171 psychological capability, social norms, beliefs, attitudes, and emotional reactions predict cat  
172 containment behavior, and that distinct audiences of cat owners exist which differ in COM  
173 factors. However, these studies have several limitations which must be noted. Firstly, in NZ  
174 MacDonald et al., [47] only investigated night containment intentions, and so the influences

175 on NZ cat owners' performance of the full scope of cat containment behaviors remain  
176 unknown. Secondly, research has primarily focused on assessing the impact of motivation  
177 and social norms on cat containment [17, 46, 47, 49], with only one study having assessed a  
178 range of COM factors [35]. Thirdly, aside from one study [17], previous study populations  
179 were limited to either one [35, 47, 49] or two localities [46], meaning previous findings may  
180 not be generalizable to wider populations of cat owners. Finally, only one study [35] assessed  
181 whether distinct segments of cat owners differed in their behavior and this study mainly  
182 highlighted differences between participants and non-participants in cat containment. This  
183 was likely due to by the high participation in cat containment (65%) that was found [35]. As  
184 such, how non-participants in cat containment may differ from one another remains unclear.

185         While preliminary research internationally has assessed the barriers and drivers of cat  
186 containment and conducted audience segmentation analysis, further research is still required  
187 in the NZ context for several reasons. Firstly, the majority of NZ owners do not participate in  
188 cat containment [14, 16], and so it is not yet known how COM-B profiles differ in a large  
189 population of non-participants. Secondly, Hall et al., [16] in an international survey of cat  
190 owners found that attitudes towards various cat management practices and perception of the  
191 issues posed by companion cats to wildlife varied significantly by country. In AU, for  
192 instance, the majority of owners believed there is a need for cat management legislation and  
193 that cats should be kept inside at night, compared with less than 40% of NZ owners and only  
194 around 20% of UK owners. Furthermore, nearly two-thirds of AU owners perceived  
195 companion cats killing wildlife to be a serious issue, compared to less than half of NZ owners  
196 and only around 10% of UK owners. According to the COM-B model [22] these differing  
197 beliefs suggest that NZ owners may be less motivated to contain their cats than AU owners,  
198 but more so than UK owners. Therefore, it can be concluded that despite the cultural and  
199 environmental similarities between NZ, AU, and the UK, there are likely different factors

200 influencing the adoption of cat containment behavior and different segments of cat owners in  
201 each country.

## 202 **The Current Study**

203 Previous research has identified barriers and drivers that influence owners' adoption  
204 of cat containment and that distinct audiences of owners may exist with unique COM-B  
205 profiles [17, 35, 46, 47, 49]. However, despite this body of research, two key questions  
206 remain unanswered. Firstly, what is the comprehensive set of COM factors that act as barriers  
207 and drivers of NZ owners' participation in cat containment, and secondly can NZ owners be  
208 segmented into unique audiences based on their COM profiles, that differ significantly in  
209 their performance of cat containment. This study sought to address these gaps in the literature  
210 using data from a quantitative cross-sectional online survey of NZ cat owners [50].

211 Consistent with the COM-B model of behavior [22] and previous research in invasive animal  
212 management [17, 19, 35-38, 46, 47, 49], the following hypotheses were made: 1) cat owners  
213 with increased capability, opportunity, and motivation to contain will have greater cat  
214 containment intentions and behavior, and 2) at least three segments of cat owners will exist in  
215 NZ which differ significantly in the set of COM factors predicting their cat containment  
216 behavior. The findings from this study will inform the design of empirically grounded  
217 behavioral interventions that address the causes of non-participation in cat containment for  
218 different audiences of cat owners in NZ, which will thereby improve the management of  
219 companion cats.

## 220 **Method**

### 221 **Participants**

222 Participants were recruited using a Lucid Marketplace online sample [51] (between  
223 (February 3, 2022 and February 10, 2022) and comprised 395 cat owners residing in NZ,

224 aged 18 years and over. Reviewing previous research that assessed the relationship between  
225 barriers and drivers of cat containment and behavior and intentions demonstrated that the  
226 smallest expected effect size for this study was  $f^2 = .20$  [47, 52, 53]. Furthermore, a previous  
227 study that segmented cat owners into audience groups based on their cat containment beliefs  
228 found a five segment solution [46]. As such a power analysis using G\*Power [54], with a  
229 power level of .90 and an  $\alpha$  level of .05, was conducted based on an expected five segment  
230 solution. The power analysis indicated at least 390 participants were required for adequate  
231 statistical power.

232 In the sample 254 participants identified as female (64%), 137 as male (35%) and four  
233 as other (1%) [50]. The mean year of birth was 1974 ( $SD = 17.18$ , range = 1931 to 2004),  
234 meaning participants were approximately 48 years old on average ( $Median = 48$ ). Most  
235 participants identified as NZ European (76%), followed by Māori (10%), and other (14%).  
236 The majority had an undergraduate qualification or greater (38%), followed by a secondary  
237 school qualification (29%). Compared to the 2018 NZ census, females and NZ European  
238 were over-represented, and participants had an older median age and were more educated  
239 (NZ 2018 census: 51% female; median age of 37; 25% with an undergraduate qualification or  
240 greater; 70% NZ European [55]). However, according to Companion Animals New Zealand  
241 [1], this is consistent with NZ cat owners. They found that cat ownership rates were highest  
242 in females (43%) and adults aged 35-64 years (43%-53%) compared with New Zealanders  
243 overall (41%). Moreover, cat ownership was significantly higher among NZ Europeans  
244 (46%) compared to other ethnic groups such as Māori (36%).

### 245 **Procedure and materials**

246 An online survey was conducted in February 2022 using the Qualtrics online survey  
247 platform [56]. The study received blanket ethics approval from the Human Ethics Committee  
248 of the University of Canterbury. Participants' informed written consent was obtained at the



249 beginning of the questionnaire. Demographics information was collected first, then  
250 definitions of ‘free-roaming cats’, ‘cat containment’, ‘cat enclosure’, and ‘cat escape-proof  
251 fence’ were provided, and after that cat containment intentions and behaviors were assessed.  
252 Finally, items pertaining to COM to perform cat containment were completed. Participants  
253 who did not pass the security checks (e.g., bot and duplicate response detection;  $n = 23$ ), did  
254 not currently own a cat ( $n = 508$ ), were born after 2004 ( $n = 1$ ), and completed the  
255 questionnaire in less than 4 minutes or failed the three attention check items (e.g., “to show  
256 that you are paying attention, we ask you to select ‘agree’”;  $n = 112$ ) were screened out. The  
257 questionnaire is shown in S1 Appendix.

## 258 **Measures**

259         The questionnaire measured cat containment intentions and behavior, and COM to  
260 perform cat containment.

### 261 **Cat containment intentions and behavior**

262         Cat containment was assessed with two subscales, Containment Intentions and  
263 Containment Behavior. Containment Intentions were measured with seven items asking  
264 participants how often in the next six months they expected to do the following behaviors:  
265 allow cat to roam freely, keep cat indoors, keep cat indoors overnight, confine cat to an  
266 escape-proof fenced yard when outside, confine cat to an enclosure when outside, walk cat on  
267 a harness and lead when outside, and fully supervise cat when outside. After reverse scoring  
268 the free-roaming item, the items were averaged into a single scale which demonstrated  
269 adequate internal consistency (Cronbach’s  $\alpha = .84$ ). Containment Behavior was assessed with  
270 seven items asking participants how often they currently did the following behaviors: allow  
271 cat to roam freely, keep cat indoors, keep cat indoors overnight, confine cat to an escape-  
272 proof fenced yard when outside, confine cat to an enclosure when outside, walk cat on a  
273 harness and lead when outside, and fully supervise cat when outside [35]. After reverse

274 scoring the free-roaming item, the items were averaged into a single scale, which  
275 demonstrated adequate internal consistency (Cronbach's  $\alpha = .83$ ). All responses were  
276 assessed on a five-point Likert scale (1 = never, 2 = rarely, 3 = sometimes, 4 = often, 5 =  
277 always).

## 278 **COM variables**

279 To assess cat owners' capability, opportunity, and motivation related to containment,  
280 seven subscales were developed with 51 items (S2 Table). The items were drawn or adapted  
281 from previous qualitative and quantitative research on barriers and drivers of cat containment  
282 [35, 46, 52, 53, 57]. To ensure all subdimensions of COM were comprehensively assessed,  
283 additional items were also drawn from related invasive species management research or  
284 developed based on behavioral theory [20, 22, 37, 38].

285 Capability was assessed with a single subscale, Capability to Contain, which  
286 comprised nine items measuring cat owners' physical capability, awareness and knowledge  
287 of the issue, memory / attention capacity, and behavioral regulation towards cat containment.  
288 All responses were assessed on a five-point Likert scale (1 = strongly disagree, 2 = disagree,  
289 3 = neither agree nor disagree, 4 = agree, 5 = strongly agree). Five items were reverse scored  
290 so that higher scores on all items reflected greater capability to contain. Following reverse  
291 scoring, the items were averaged to create a single scale, which demonstrated adequate  
292 internal consistency (Cronbach's  $\alpha = .70$ ).

293 Opportunity was assessed with two subscales, Physical and Social Opportunity to  
294 Contain. Physical Opportunity to Contain was measured with eight items that assessed time,  
295 resource availability, and environmental context relevant to cat containment. These responses  
296 were assessed on a five-point Likert scale (1 = strongly agree, 2 = agree, 3 = neither agree nor  
297 disagree, 4 = disagree, 5 = strongly disagree), with higher scores reflecting greater physical  
298 opportunity to contain. The scores for the items were averaged to create a single scale, which

299 demonstrated adequate internal consistency (Cronbach's  $\alpha = .81$ ). Social Opportunity to  
300 Contain was measured with four items. The items assessed interpersonal influences on cat  
301 containment (e.g., veterinarians, other cat owners). Responses were assessed on a five-point  
302 Likert scale (1 = strongly oppose, 2 = oppose, 3 = neutral, 4 = support, 5 = strongly support),  
303 with higher scores indicating greater social opportunity to contain. The scores for the items  
304 were averaged to create a single scale, which demonstrated adequate internal consistency  
305 (Cronbach's  $\alpha = .86$ ).

306 Motivation was assessed with four subscales; Concern About Roaming, Containment  
307 is Beneficial for Cat Beliefs, Pro-Containment Beliefs, and Automatic Motivation to Contain.  
308 Concern About Roaming was measured using 11 items, assessing perceived levels of concern  
309 about potential issues related to cats roaming freely, such as injury or death on the road and  
310 killing wildlife. Responses were assessed on a five-point Likert scale (1 = unconcerned, 2 =  
311 slightly concerned, 3 = somewhat concerned, 4 = very concerned, 5 = extremely concerned),  
312 with higher scores indicating greater concern about consequences of roaming. The scores for  
313 the items were then averaged to create a single scale which demonstrated high internal  
314 consistency (Cronbach's  $\alpha = .95$ ). Containment is Beneficial for Cat Beliefs was measured  
315 with four items, assessing the perceived impact of containment on a cat's quality of life.  
316 Responses were assessed on a five-point Likert scale (1 = very harmful, 2 = harmful, 3 =  
317 neither beneficial nor beneficial, 4 = beneficial, 5 = very beneficial) with higher scores  
318 indicating greater perceived benefit of containment for cats. The scores for the items were  
319 averaged to create a single scale which demonstrated adequate internal consistency  
320 (Cronbach's  $\alpha = .80$ ). Pro-Containment Beliefs were measured with 13 items, assessing  
321 beliefs and attitudes towards containment and roaming, perceived effort of containment, and  
322 social role identity. All responses were assessed on a five-point Likert scale (1 = strongly  
323 disagree, 2 = disagree, 3 = neither agree nor disagree, 4 = agree, 5 = strongly agree). Nine

324 items were reverse scored so that higher scores on all items represented stronger pro-  
325 containment beliefs. The scores for the items were averaged to create a single scale which  
326 demonstrated high internal consistency (Cronbach's  $\alpha = .90$ ). Automatic Motivation to  
327 Contain was measured with two items, assessing emotions towards containment and  
328 containment habits on a five-point Likert scale (1 = strongly agree, 2 = agree, 3 = neither  
329 agree nor disagree, 4 = disagree, 5 = strongly disagree), with higher scores indicating  
330 stronger automatic motivation to contain. The scores for the items were averaged to create a  
331 single scale, which demonstrated adequate internal consistency (Cronbach's  $\alpha = .81$ ).

### 332 **Statistical analyses**

333 Descriptive analysis & bivariate correlations were conducted to assess relationships  
334 among all variables, followed by multiple regression analyses to determine the degree to  
335 which COM variables predicted Containment Intentions and Behavior. Latent profile analysis  
336 (LPA) was then used to classify participants into homogenous subgroups based on their  
337 scores on COM variables. Bayesian Information Criterion (BIC), Akaike's Information  
338 Criterion (AIC) and Entropy were used to assess the relative model fit of the profile solutions  
339 and the Lo-Mendell-Rubin (LMR) test was used for model comparison. Lower AIC and BIC  
340 values indicate better model fit whilst lower Entropy values indicate greater uncertainty in the  
341 model [58-61]. LMR is a significant test that compares the likelihood ratio of a model with  
342 one which has less profile groups [61, 62]. Multivariate analysis of variance (MANOVA)  
343 was then conducted to validate the profiles and determine what proportion of variance in the  
344 cat containment behavioral variables was explained by the subgroups. Follow up analyses of  
345 variance (ANOVAs) were then used to test for significant differences in the two cat  
346 containment behavioral variables between the segments. Mplus 7.0 was used to conduct the  
347 LPA [63] and SPSS was used for all other analyses [64].

348

## 349 **Results**

### 350 **Descriptive statistics & bivariate correlations for all study variables**

351 A summary of the full sample means, standard deviations, and intercorrelations for all  
352 variables are shown in Table 1. All COM variables had moderate to large significant  
353 associations with Containment Intentions and Behavior ( $r > .30$ ) [65]. As expected, increases  
354 in levels of the COM variables were all associated with increases in cat owners' cat  
355 containment intentions and behavior.

### 356 **Predicting cat containment behavior with the COM variables**

357 Multiple regression was used to investigate the extent to which COM factors  
358 predicted cat containment intentions and behavior. In the first analysis, the factors Capability  
359 to Contain, Physical Opportunity to Contain, Social Opportunity to Contain, Concern About  
360 Roaming, Containment is Beneficial for Cat Beliefs, Pro-Containment Beliefs, and  
361 Automatic Motivation to Contain were used to predict Containment Intentions, and in the  
362 second analysis these factors were used to predict Containment Behavior. All variables were  
363 simultaneously entered into the models.

364 The results from the multiple regression analyses for Containment Intentions is  
365 summarized in Table 2 and Containment Behavior in Table 3. Capability to Contain, Concern  
366 About Roaming, Containment is Beneficial for Cat Beliefs, and Automatic Motivation to  
367 Contain were all significant predictors of Containment Intentions and Containment Behavior.  
368 These results demonstrate that cat owners intended to perform and performed cat  
369 containment to a greater extent when they; 1) had the psychological and physical capability  
370 to contain their cat, 2) were concerned about the negative consequences of roaming, 3)  
371 believed containment is beneficial for a cat, and 4) had automatic motivation to perform cat  
372 containment. While Physical Opportunity to Contain, Social Opportunity to Contain, and

373 Pro-Containment Beliefs were not significant predictors of Containment Intentions and  
374 Behavior, they were all individually significantly associated with Containment Intentions and  
375 Behavior (Table 1). Overall, the models explained 57% of the variance in Containment  
376 Intentions and 56% of the variance in Containment Behavior. Of the variance explained in  
377 Containment Intentions, Containment is Beneficial for Cat Beliefs and Concern About  
378 Roaming each uniquely explained 3%, Automatic Motivation to Contain 2%, and Capability  
379 to Contain 1%. Of the variance explained in Containment Behavior, Containment is  
380 Beneficial for Cat Beliefs uniquely explained 4%, Concern About Roaming 3%, Automatic  
381 Motivation to Contain 2%, and Capability to Contain 1%.

**Table 1. Descriptive statistics and correlations for all variables**

| Variable                                     | <i>M</i> | <i>SD</i> | 1          | 2          | 3          | 4          | 5          | 6          | 7          | 8          | 9 |
|----------------------------------------------|----------|-----------|------------|------------|------------|------------|------------|------------|------------|------------|---|
| 1. Containment Behavior                      | 1.85     | 0.75      | —          |            |            |            |            |            |            |            |   |
| 2. Containment Intentions                    | 1.87     | 0.80      | .95*       | —          |            |            |            |            |            |            |   |
|                                              |          |           | [.92, .96] |            |            |            |            |            |            |            |   |
| 3. Capability to Contain                     | 3.15     | 0.65      | .49*       | .50*       | —          |            |            |            |            |            |   |
|                                              |          |           | [.41, .56] | [.42, .57] |            |            |            |            |            |            |   |
| 4. Physical Opportunity to Contain           | 2.87     | 0.92      | .33*       | .34*       | .61*       | —          |            |            |            |            |   |
|                                              |          |           | [.24, .42] | [.26, .42] | [.53, .67] |            |            |            |            |            |   |
| 5. Social Opportunity to Contain             | 2.69     | 0.85      | .48*       | .50*       | .30*       | .22*       | —          |            |            |            |   |
|                                              |          |           | [.39, .56] | [.42, .57] | [.19, .39] | [.12, .32] |            |            |            |            |   |
| 6. Concern About Roaming Beliefs             | 2.78     | 1.06      | .49*       | .50*       | .30*       | .18*       | .38*       | —          |            |            |   |
|                                              |          |           | [.41, .57] | [.42, .58] | [.20, .40] | [.07, .28] | [.28, .47] |            |            |            |   |
| 7. Containment is Beneficial for Cat Beliefs | 2.59     | 0.79      | .66*       | .66*       | .45*       | .32*       | .61*       | .48*       | —          |            |   |
|                                              |          |           | [.60, .71] | [.60, .71] | [.36, .53] | [.22, .41] | [.54, .67] | [.39, .56] |            |            |   |
| 8. Pro-Containment Beliefs                   | 2.59     | 0.72      | .66*       | .68*       | .60*       | .44*       | .64*       | .49*       | .73*       | —          |   |
|                                              |          |           | [.60, .73] | [.62, .74] | [.51, .66] | [.35, .53] | [.57, .71] | [.40, .58] | [.68, .77] |            |   |
| 9. Automatic Motivation to Contain           | 2.07     | 1.03      | .63*       | .64*       | .55*       | .41*       | .53*       | .32*       | .63*       | .80*       | — |
|                                              |          |           | [.55, .70] | [.57, .70] | [.46, .62] | [.32, .50] | [.43, .61] | [.22, .41] | [.55, .70] | [.74, .84] |   |

Note:  $N = 395$ . Pearson's correlation coefficient,  $r = .30$  specifies a medium effect size and  $r = .50$  a large effect size [65]. Values in square brackets indicate bias corrected and accelerated bootstrap 95% confidence interval per correlation.

All variables range from a minimum 1 to maximum 5.

\*  $p < .001$  (2-tailed).

**Table 2. Predicting containment intentions from capability, opportunity, and motivation factors of containment**

| Predictors                                | B     | 95% CI for B |      | SE B | $\beta$ | $sr^2$ |
|-------------------------------------------|-------|--------------|------|------|---------|--------|
|                                           |       | LB           | UB   |      |         |        |
| Constant                                  | -.47  | -.77         | -.17 | .15  | -       | -      |
| Capability to Contain                     | .13*  | .01          | .25  | .06  | -.11    | .01    |
| Physical Opportunity to Contain           | -.00  | -.07         | .07  | .04  | -.00    | .00    |
| Social Opportunity to Contain             | .03   | -.05         | .11  | .04  | .03     | .00    |
| Concern About Roaming                     | .14** | .09          | .20  | .30  | .20     | .03    |
| Containment is Beneficial for Cat Beliefs | .27** | .16          | .37  | .05  | .26     | .03    |
| Pro-Containment Beliefs                   | .15   | -.01         | .30  | .08  | .13     | .00    |
| Automatic Motivation to Contain           | .18** | .10          | .27  | .04  | .24     | .02    |

Notes:  $N = 395$ . B = unstandardized beta coefficients. CI = confidence interval. LB = lower bound. UB = upper bound.  $\beta$  = standardized beta coefficients.  $sr^2$  = squared semi-partial correlation coefficient (the proportion of variance the predictor uniquely explained in the dependent variable over and above the other predictors). All predictors ranged from a minimum 1 to maximum 5.

$R^2 = .57$ . Adjusted  $R^2 = .57$ .

\*  $p < .050$ , \*\*  $p < .001$ .



**Table 3. Predicting containment behavior from capability, opportunity, and motivation factors of containment**

| Predictors                                | B     | 95% CI for B |      | SE B | $\beta$ | $sr^2$ |
|-------------------------------------------|-------|--------------|------|------|---------|--------|
|                                           |       | LB           | UB   |      |         |        |
| Constant                                  | -.29  | -.57         | -.00 | .15  | -       | -      |
| Capability to Contain                     | .13*  | .02          | .24  | .06  | -.01    | .01    |
| Physical Opportunity to Contain           | -.01  | -.08         | .06  | .04  | -.01    | .00    |
| Social Opportunity to Contain             | .01   | -.08         | .09  | .04  | .01     | .00    |
| Concern About Roaming                     | .14** | .08          | .19  | .30  | .20     | .03    |
| Containment is Beneficial for Cat Beliefs | .29** | .19          | .39  | .05  | .30     | .04    |
| Pro-Containment Beliefs                   | .09   | -.06         | .24  | .08  | .08     | .00    |
| Automatic Motivation to Contain           | .18** | .10          | .27  | .04  | .25     | .02    |

Notes:  $N = 395$ . B = unstandardized beta coefficients. CI = confidence interval. LB = lower bound. UB = upper bound.  $\beta$  = standardized beta coefficients.  $sr^2$  = squared semi-partial correlation coefficient (the proportion of variance the predictor uniquely explained in the dependent variable over and above the other predictors). All predictors ranged from a minimum 1 to maximum 5.

$R^2 = .56$ . Adjusted  $R^2 = .55$ .

\*  $p < .050$ , \*\*  $p < .001$ .

### Segmentation of cat owners based on COM variables

LPA was conducted to determine whether there are multiple unique segments of cat owners, that differ in their COM to perform cat containment. The results identified four different cat owner profiles based on the COM variables. Table 4 shows a summary of the LPA model fit indices pertaining to two to five profile solutions. The five-profile solution had the lowest AIC and BIC values, indicating it had the best model fit, however, LMR indicated that a five-profile solution did not significantly better fit the data than a four-profile solution. In addition, with an Entropy value greater than .80, the four-profile solution is supported to

have minimal uncertainty in its profile classification of individuals (according to Celeux and Soromenho, and Tein et al., as cited in Ferguson et al., [61]). Therefore, the four-profile solution was retained for interpretation. The segments were labelled; *engaged*, *receptive*, *ambivalent*, and *opposed*. The deviation of each segment from the sample mean for the COM variables is shown in Fig 1.

**Table 4. Model fit indices for two to five cat owner profile solutions**

| Profile Solution | AIC     | BIC     | Entropy | LMR    | <i>p</i> |
|------------------|---------|---------|---------|--------|----------|
| 2                | 6171.47 | 6259.00 | .91     | 770.62 | .070     |
| 3                | 5823.78 | 5943.14 | .85     | 356.24 | .380     |
| 4                | 5659.76 | 5810.96 | .87     | 176.33 | .008     |
| 5                | 5621.56 | 5804.53 | .84     | 53.15  | .550     |

Notes: AIC = Akaike's Information Criterion. BIC = Bayesian Information Criteria. LMR = Lo-Mendel-Rubin likelihood ratio test. Lower values of AIC and BIC indicate better model fit, and low entropy values indicate more uncertainty in a model's classification of individuals [58-61]. LMR is a significant test that compares the likelihood ratio of a model with one that has less profile groups [62].

**Fig. 1. Standardized means of the capability, opportunity, and motivation factors across the four cat owner profiles.** Notes: Engaged, *n* = 22. Receptive, *n* = 68. Ambivalent, *n* = 188. Opposed, *n* = 117. Standardized means reflect the segment's deviation from the sample mean on the variables.

The smallest segment *engaged* (*n* = 22, 6%), had the highest levels of all COM variables relative to the other segments. Members of this segment had the strongest Automatic Motivation to Contain, Pro-Containment Beliefs, and Capability to Contain. The *receptive* segment (*n* = 68, 17%) had the second highest levels of all COM variables. They

had moderate Automatic Motivation to Contain, Pro-Containment Beliefs, Containment is Beneficial for Cat Beliefs, and Social Opportunity to Contain. Their Capability to Contain and Physical Opportunity to Contain, while still above average, were however relatively lower than the other COM factors. The largest segment, *ambivalent* ( $n = 188, 48\%$ ), had overall average levels of the COM variables. Their Social Opportunity to Contain, Concern About Roaming, and Containment is Beneficial for Cat Beliefs were slightly above average relative to others in the sample. In addition, their Capability to Contain, Physical Opportunity to Contain, and Automatic Motivation to Contain were slightly below average. The *opposed* segment ( $n = 117, 30\%$ ) had the lowest overall levels of the COM variables. They had the lowest Pro-Containment Beliefs, Containment is Beneficial for Cat Beliefs, and Social Opportunity to Contain.

### **Demographic characteristics of cat owner profiles**

In terms of demographic characteristics, the *receptive* segment had the highest proportion of females (68%) and the *engaged* and *opposed* segments had the highest proportion of NZ Europeans (both 86%). The *engaged* segment had the highest proportion of those living in urban localities (urban, suburban, rural residential; 95%) and the *ambivalent* and *opposed* segments had the largest proportion of those with a medium to large garden at their residence (90% and 88% respectively). One-way ANOVAs found that the segments did not differ significantly in their year of birth,  $F(3, 391) = 1.98, p = .116$  or education level,  $F(3, 391) = 1.56, p = .199$ . Unstandardized segment descriptive statistics for all study variables are shown in S3 Table.

### **Validation of cat owner segments**

The relationship between membership in the four cat owner segments and the cat containment behavioral variables were then examined using MANOVA to confirm if segment membership predicted cat containment. Two follow up ANOVAs with post-hoc tests

were then used to test for significant differences in Containment Intentions and Behavior between the segments.

The MANOVA demonstrated that the four cat owner profiles explained 31% of the variance in the cat containment behavioral variables,  $\eta^2 = .31$ ,  $V = .47$ ,  $F(6, 780) = 59.13$ ,  $p < .001$ . Two follow up one-way ANOVAs were then conducted to determine the group effect for each behavioral variable. Levene's test for equality of variance was significant for Containment Intentions ( $p < .001$ ) and Containment Behavior ( $p < .001$ ). Given the heterogeneity of variances, the more robust Welch's  $F$  test was used for the univariate significance tests [66]. A significant effect of group on levels of Containment Intentions,  $\eta^2 = .52$ ,  $F(3, 79.55) = 107.28$ ,  $p < .001$ , and on levels of Containment Behavior  $\eta^2 = .49$ ,  $F(3, 80.05) = 89.07$ ,  $p < .001$  was found.

To determine which groups differed significantly, post-hoc comparisons using the Games-Howell test, which is considered the most accurate when population variances are unequal, were conducted (according to Toothaker, as cited in Field [66]). All segments were found to differ significantly from each other in their Containment Intentions ( $p \leq .005$ ) and Containment Behavior ( $p \leq .003$ ). As shown in Fig 2, the *engaged* segment had the highest levels of both Containment Intentions ( $M = 3.35$ ,  $SD = .71$ ) and Containment Behavior ( $M = 3.27$ ,  $SD = .73$ ), followed by *receptive* (Containment Intentions  $M = 2.70$ ,  $SD = .87$ ; Containment Behavior  $M = 2.58$ ,  $SD = .77$ ), *ambivalent* (Containment Intentions  $M = 1.73$ ,  $SD = .50$ ; Containment Behavior  $M = 1.72$ ;  $SD = .50$ ), and *opposed* (Containment Intentions  $M = 1.34$ ,  $SD = .33$ ; Containment Behavior  $M = 1.38$ ;  $SD = .38$ ). These results support that distinct audiences of cat owners exist among surveyed owners with their cat containment intentions and behavior being determined by different COM profiles.

**Fig. 2. Means of the intentions and behavior variables for the four cat owner profiles.**

Notes: Engaged,  $n = 22$ . Receptive,  $n = 68$ . Ambivalent,  $n = 188$ . Opposed,  $n = 117$ . The error bars represent 95% confidence intervals. All variables ranged from a minimum 1 to maximum 5.

## Discussion

This study sought to identify the barriers and drivers of cat containment for NZ cat owners. Firstly, it was investigated whether cat owners with greater capability, opportunity, and motivation (COM) to perform cat containment were more likely to contain their cat. Secondly, this study sought to determine if unique segments of cat owners with different COM profiles and cat containment behaviors exist in NZ. This thereby extended the literature by rigorously assessing both cat containment intentions and behavior of NZ cat owners, with consideration given to the wide variety of behaviors that can comprise cat containment practices (e.g., night-containment, cat-enclosures, always inside). Furthermore, by applying the COM-B framework [22], this study identified additional predictors of cat containment and determined whether NZ cat owners, who are mostly non-participants in cat containment, can be segmented into unique audiences based on their COM profiles.

Our study found that cat containment was rarely intended to be performed, and rarely performed by NZ cat owners. Engagement in cat containment was found to be positively associated with all COM factors and it was uniquely predicted by capability and motivational factors. In addition, this study identified four audiences of cat owners who differed in the COM factors predicting their cat containment intentions and behavior. These findings are explored below and practical implications, recommendations for future research, and acknowledgements of the limitations of this study are provided.

## **What predicts cat owners' participation in cat containment?**

As hypothesized, higher levels of COM to perform cat containment predicted cat containment intentions and behavior. All capability, opportunity, and motivational factors assessed in this study were positively associated with cat containment intentions and behavior. The factors that uniquely predicted intentions and behavior were Capability to Contain, Concern About Roaming, Containment is Beneficial for Cat Beliefs, and Automatic Motivation to Contain. Although Physical and Social Opportunity to Contain and Pro-Containment Beliefs were not significant predictors over-and-above the other factors, they were each independently associated with intentions and behavior. As such, these findings demonstrate that cat containment was performed to a significantly greater extent when cat owners had the capability to perform containment (e.g., skills, memory, knowledge, awareness, and behavioral regulation), had physical and social opportunity enabling containment (e.g., time, environmental circumstances, and interpersonal influences), were concerned about the negative consequences of roaming (e.g., cat being injured or killing wildlife), believed that containment has a beneficial impact on a cat's quality of life, had pro-containment beliefs, and had greater automatic motivation to contain.

This study extends previous findings by undertaking to the best of our knowledge, the most comprehensive assessment of cat owners' COM to perform cat containment to date. Furthermore, this study demonstrated that a range of additional factors are statistically reliable predictors of cat containment intentions and behavior. This is consistent with the COM-B model of behavior which states that behavior is determined by a person's capability, opportunity, and motivation [22]. Finally, this study builds upon previous findings which demonstrated that psychological capability, beliefs, attitudes, and social influences were predictors of cat containment [17, 35, 46, 47, 49, 53].

## Audience segmentation of cat owners based on COM

As hypothesized, audience segmentation analysis demonstrated that NZ cat owners could be segmented into four subgroups, which differed significantly in the set of COM factors predicting their behavior. By supporting that four different audiences of cat owners may exist in NZ, **tailored interventions can now be designed** to address the underlying causes of non-participation for each audience identified and **decisions can be made about who should be targeted for behavior change** [19, 20]. The four cat owner segments were labelled; *engaged*, *receptive*, *ambivalent*, and *opposed*. *Engaged* cat owners (6%) were characterized by the highest COM factors and the highest participation in cat containment, followed by *receptive* (17%), and *ambivalent* cat owners (48%). *Opposed* cat owners (30%) were characterized by the lowest COM factors and the lowest participation in cat containment.

These findings have some similarities with other research, but also some key differences. Crowley et al., [46] identified five cat owner segments based on their beliefs, attitudes, and emotional reactions, however, did not consider situational and contextual factors. Furthermore, they did not evidence whether membership in these segments predicted behavior. While McLeod et al., [35] also identified four cat-owner segments that differed significantly in their behavior, the largest segment identified were those who *always* contained their cat, while in the current study those who *engaged* in cat containment were the smallest segment. This suggests that NZ cat owners are mostly non-participants in cat containment compared to those in AU, which is consistent with previous research [16]. NZ owners therefore appear to face greater barriers and less drivers of cat containment. In addition, McLeod et al., [35] found that the main COM differences were between the segment who *always* contained their cat and the segments that did not perform containment (*night curfew*, *sporadic*, and *never*). Those who *always* contained had stronger perceived behavioral control, beliefs about the benefit of containment to cats, and social normative

influences than the other groups. The current study, however, found that all identified segments differed from each other on a broad set of COM factors. These differences may be due to the more comprehensive set of COM factors assessed in this study, leading to a more nuanced understanding of cat owners surveyed. Additionally, it may suggest that cross-cultural variations exist, with NZ cat owners, who are mainly non-participants in cat containment, being more heterogeneous on a larger range of COM factors than AU cat owners. Reasons for this may include the success of cat containment campaigns that have taken place in AU since the 1990s [14, 35, 49], the additional wildlife risks to cats in AU (e.g., venomous snakes; [57]), and the more extensive cat management regulations in AU compared to NZ [67].

### **Practical implications**

The findings from this study have several implications for practitioners seeking to increase participation in cat containment, such as government agencies and wildlife protection and animal welfare organizations. The identification of different audiences of cat owners suggests that it **may be necessary to tailor interventions to each segment** to promote behavior change. Furthermore, targeting *receptive* and *ambivalent* cat owners, **who represented around two thirds of those surveyed and exhibited fewer barriers to change**, could provide the best opportunity to exponentially increase cat containment practices in NZ.

The behavior change wheel (BCW) [22] can be applied to identify appropriate behavior change techniques for each segment [19, 20]. The BCW is a framework which links capability, opportunity, and motivational factors with strategies to address them [22]. For those *receptive* to cat containment, factors that need to be addressed were Capability to Contain, Physical Opportunity to Contain, and Concern About Roaming. According to the BCW [22], Capability to Contain could be increased through *training*, for instance, by offering workshops for cat owners on how to build their own cat enclosure. Physical



Opportunity to Contain could be increased through *environmental restructuring* (e.g., improving the availability of cat containment products such as cat escape-proof fence systems). To increase Concern About Roaming, *education* could be used to inform cat owners about the prevalence of roaming-related accidents to cats [57]. The same techniques could also be applied to *ambivalent* cat owners, who also have low Capability to Contain, Physical Opportunity to Contain, and Concern About Roaming. However, consideration should also be given to improving their low Automatic Motivation to Contain, for instance through *modeling*. Influencers who perform cat containment in social media campaigns could act as role models to create positive associations with cat containment for *ambivalent* cat owners (e.g., showing off their ‘catio’ to their followers).

Whilst practitioners may prioritize targeting *receptive* and *ambivalent* cat owners, some consideration should also be given to *engaged* and *opposed* cat owners. *Opposed* cat owners could be shifted to become more *ambivalent* or even *receptive* to cat containment by using *persuasion* to address their lack of Pro-Containment Beliefs [18, 22]. This could involve using credible messengers, such as veterinarians, to communicate the benefits of enrichment for contained cats (e.g., providing food puzzles) and to persuade them that contained cats can be healthy and happy [20, 22, 68]. Finally, the techniques outlined could also be used to maintain the high participation in cat containment in *engaged* cat owners.

### **Limitations & future research**

Limitations of this research include the use of self-report measures of behavior and a cross-sectional study design. While self-report measures have a number of benefits, they can have a recall and social desirability bias, as has been found in the assessment of lifestyle behaviors [69, 70], and thus lead to over- or under-reporting of behavior. In addition, the cross-sectional design of this study does not allow for strong directional causal inferences between COM factors and behavior to be determined [71]. Finally, while participants’

demographic backgrounds appeared broadly consistent with NZ cat owners [1], the present study relied on an online panel sample which may not be generalizable to the wider population of NZ cat owners.

Future research using a longitudinal research design with intensive measurement of behavior could be conducted to better understand the direction of the relationship between the COM factors and behavior, and to prevent recall bias. Additionally, research should explore whether cat owner segments differ in their demographic backgrounds (e.g., gender, locality, dwelling type) and the characteristics of the owned cat (e.g., breed, sex, health status, behavioral issues). Finally, research should design interventions using a tool such as the BCW [22] to directly address the set of COM factors found to predict the cat containment behavior of the different cat owner audiences, in congruence with the behavior change process outlined by Hine et al., [20] and McLeod et al., [19]. Experimental designs with long-term follow ups can be used to assess the efficacy and effectiveness of interventions in promoting enduring behavior change in cat owners.

## Conclusion

This study demonstrated that a sample of NZ cat owners are largely non-participants in cat containment, with various capability, opportunity, and motivational factors predicting their cat containment intentions and behavior. This study extends our understanding of cat containment behavior by supporting the influence situational and contextual factors have on whether NZ cat owners contain their cats or not. Audience segmentation analysis revealed that cat-owners surveyed were not a homogenous group, with four segments identified that have unique sets of COM factors predicting cat containment. More than three quarters were either *ambivalent* or *opposed* to containment, with only a minority being *engaged* or *receptive* towards it. Interventions seeking to promote cat containment among NZ cat owners

should target those *receptive* and *ambivalent* towards cat containment to have the greatest overall impact on the issue of free-roaming companion cats.

## Acknowledgements

We thank all the participants in this study for the time and input they provided. A special thanks as well to Andreas K. Jaeger for his support and proof-reading.

## References

1. Companion Animals New Zealand. Companion animals in New Zealand 2020. 2020.
2. National Animal Welfare Advisory Committee. Code of Welfare: Companion Cats. Wellington: Ministry for Primary Industries (MPI), 2018.
3. Kikillus KH, Chambers GK, Farnworth MJ, Hare KM. Research challenges and conservation implications for urban cat management in New Zealand. *Pacific Conservation Biology*. 2016;23(1):15-24. doi: <https://doi.org/10.1071/PC16022>
4. Tan SML, Stellato AC, Niel L. Uncontrolled outdoor access for cats: an assessment of risks and benefits. *Animals*. 2020;10(2):258. PubMed PMID: doi:10.3390/ani10020258.
5. Bruce SJ, Zito S, Gates MC, Aguilar G, Walker JK, Goldwater N, et al. Predation and risk behaviors of free-roaming owned cats in Auckland, New Zealand via the use of animal-borne cameras. *Frontiers in Veterinary Science*. 2019;6:205-. doi: 10.3389/fvets.2019.00205.
6. van Heezik Y, Smyth A, Adams A, Gordon J. Do domestic cats impose an unsustainable harvest on urban bird populations? *Biological Conservation*. 2010;143(1):121-30. doi: <https://doi.org/10.1016/j.biocon.2009.09.013>.
7. Flux JEC. Seventeen years of predation by one suburban cat in New Zealand. *New Zealand Journal of Zoology*. 2007;34(4):289-96. doi: 10.1080/03014220709510087.

8. Gordon J, Matthaei C, Van Heezik Y. Belled collars reduce catch of domestic cats in New Zealand by half. *Wildlife research*. 2010;37(5):372-8. doi: <https://doi.org/10.1071/WR09127>.
9. Loyd K, Hernandez S, Abernathy K, Shock B, Marshall G. Risk behaviours exhibited by free- roaming cats in a suburban US town. *Veterinary Record*. 2013;173(12):295-. doi: <https://doi.org/10.1136/vr.101222>
10. Woods M, McDonald RA, Harris S. Predation of wildlife by domestic cats *Felis catus* in Great Britain. *Mammal review*. 2003;33(2):174-88. doi: <https://doi.org/https://doi.org/10.1046/j.1365-2907.2003.00017.x>
11. Medina FM, Bonnaud E, Vidal E, Nogales M. Underlying impacts of invasive cats on islands: not only a question of predation. *Biodiversity and Conservation*. 2014;23:327-42. doi: <https://doi.org/10.1007/s10531-013-0603-4>.
12. Lepczyk CA, Lohr CA, Duffy DC. A review of cat behavior in relation to disease risk and management options. *Applied Animal Behaviour Science*. 2015;173:29-39. doi: <https://doi.org/10.1016/j.applanim.2015.07.002>.
13. Department of Conservation. Toxoplasmosis and Hector's and Māui dolphin n.d. Available from: <https://www.doc.govt.nz/nature/pests-and-threats/diseases/toxoplasmosis-and-hectors-and-maui-dolphin/>.
14. Linklater WL, Farnworth MJ, van Heezik Y, Stafford KJ, MacDonald EA. Prioritizing cat- owner behaviors for a campaign to reduce wildlife depredation. *Conservation Science and Practice*. 2019;1(5):e29. doi: <https://doi.org/10.1111/csp2.29>
15. Cecchetti M, Crowley SL, Wilson-Aggarwal J, Nelli L, McDonald RA. Spatial behavior of domestic cats and the effects of outdoor access restrictions and

- interventions to reduce predation of wildlife. *Conservation Science and Practice*. 2022;4(2):e597. doi: <https://doi.org/10.1111/csp2.597>.
16. Hall CM, Adams NA, Bradley SJ, Bryant KA, Davis AA, Dickman CR, et al. Community attitudes and practices of urban residents regarding predation by pet cats on wildlife: an international comparison. *PLoS ONE*. 2016;11(4):e0151962. doi: 10.1371/journal.pone.0151962.
  17. Tan SML, Jajou S, Stellato AC, Niel L. Perspectives of Canadian and American cat owners on provision of uncontrolled outdoor access for owned domestic cats. *Frontiers in Veterinary Science*. 2021;8. doi: 10.3389/fvets.2021.742245.
  18. McLeod LJ, Driver AB, Bengsen AJ, Hine DW. Refining Online Communication Strategies for Domestic Cat Management. *Anthrozoös*. 2017;30(4):635-49. doi: 10.1080/08927936.2017.1370237.
  19. McLeod LJ, Hine DW, Driver AB. Change the humans first: Principles for improving the management of free-roaming cats. *Animals*. 2019;9(8):555. doi: <https://doi.org/10.3390/ani9080555>
  20. Hine DW, McLeod LJ, Driver AB. Designing behaviour change interventions for invasive animal control: a practical guide. Centre for Invasive Species Solution: Canberra, Australia. 2019.
  21. McKenzie-Mohr D. Fostering sustainable behavior: An introduction to community-based social marketing: New Society Publishers; 2011.
  22. Michie S, van Stralen MM, West R. The behaviour change wheel: A new method for characterising and designing behaviour change interventions. *Implementation Science*. 2011;6(1):42. doi: 10.1186/1748-5908-6-42.
  23. Flannery C, McHugh S, Anaba AE, Clifford E, O’Riordan M, Kenny LC, et al. Enablers and barriers to physical activity in overweight and obese pregnant women:

- an analysis informed by the theoretical domains framework and COM-B model. *BMC Pregnancy and Childbirth*. 2018;18(1):1-13. doi: <https://doi.org/10.1186/s12884-018-1816-z>.
24. McDonagh LK, Saunders JM, Cassell J, Curtis T, Bastaki H, Hartney T, et al. Application of the COM-B model to barriers and facilitators to chlamydia testing in general practice for young people and primary care practitioners: a systematic review. *Implementation Science*. 2018;13(1):1-19. doi: <https://doi.org/10.1186/s13012-018-0821-y>.
25. Barker F, Atkins L, de Lusignan S. Applying the COM-B behaviour model and behaviour change wheel to develop an intervention to improve hearing-aid use in adult auditory rehabilitation. *International journal of audiology*. 2016;55(sup3):S90-S98. doi: 10.3109/14992027.2015.1120894.
26. Williams KN, Thompson LM, Sakas Z, Hengstermann M, Quinn A, Díaz-Artiga A, et al. Designing a comprehensive behaviour change intervention to promote and monitor exclusive use of liquefied petroleum gas stoves for the Household Air Pollution Intervention Network (HAPIN) trial. *BMJ open*. 2020;10(9):e037761. doi: 10.1136/bmjopen-2020-037761.
27. Thompson LM, Diaz-Artiga A, Weinstein JR, Handley MA. Designing a behavioral intervention using the COM-B model and the theoretical domains framework to promote gas stove use in rural Guatemala: a formative research study. *BMC Public Health*. 2018;18(1):1-17. doi: <https://doi.org/10.1186/s12889-018-5138-x>.
28. West R, Michie S, Rubin GJ, Amlôt R. Applying principles of behaviour change to reduce SARS-CoV-2 transmission. *Nature Human Behaviour*. 2020;4(5):451-9. doi: 10.1038/s41562-020-0887-9.

29. Herber OR, Atkins L, Störk S, Wilm S. Enhancing self-care adherence in patients with heart failure: a study protocol for developing a theory-based behaviour change intervention using the COM-B behaviour model (ACHIEVE study). *BMJ open*. 2018;8(9):e025907. doi: <http://dx.doi.org/10.1136/bmjopen-2018-025907>.
30. Webb J, Moxon S. A study protocol to understand urban rewilding behaviour in relation to adaptations to private gardens. *Cities & Health*. 2021:1-9. doi: <https://doi.org/10.1080/23748834.2021.1893047>.
31. Sundaraja CS, Hine DW, Lykins AD. Palm oil: Understanding barriers to sustainable consumption. *PLoS ONE*. 2021;16(8):e0254897. doi: 10.1371/journal.pone.0254897.
32. Allison AL, Lorencatto F, Michie S, Miodownik M. Barriers and enablers to food waste recycling: a mixed methods study amongst UK citizens. *International journal of environmental research and public health*. 2022;19(5):2729.
33. Kropf B, Schmid E, Schönhart M, Mitter H. Exploring farmers' behavior toward individual and collective measures of Western Corn Rootworm control—A case study in south-east Austria. *Journal of Environmental Management*. 2020;264:110431. doi: <https://doi.org/10.1016/j.jenvman.2020.110431>.
34. Prosser N, Green M, Ferguson E, Tildesley M, Hill E, Keeling M, et al. Cattle farmer psychosocial profiles and their association with control strategies for bovine viral diarrhoea. *Journal of Dairy Science*. 2022;105(4):3559-73. doi: 10.3168/jds.2021-21386.
35. McLeod LJ, Hine DW, Bengsen AJ. Born to roam? Surveying cat owners in Tasmania, Australia, to identify the drivers and barriers to cat containment. *Preventive Veterinary Medicine*. 2015;122(3):339-44. doi: <https://doi.org/10.1016/j.prevetmed.2015.11.007>



36. McLeod LJ, Hine DW. Using audience segmentation to understand nonparticipation in invasive mammal management in Australia. *Environmental Management*. 2019;64(2):213-29. doi: <https://doi.org/10.1007/s00267-019-01176-5>
37. Hine DW, McLeod LJ, Please PM. Understanding why peri-urban residents do not report wild dog impacts: an audience segmentation approach. *Human Dimensions of Wildlife*. 2020;25(4):355-71. doi: 10.1080/10871209.2020.1735579.
38. McLeod LJ, Hine DW, Please PM, Driver AB. Applying behavioral theories to invasive animal management: towards an integrated framework. *Journal of Environmental Management*. 2015;161:63-71.
39. Slater MD. Theory and method in health audience segmentation. *Journal of Health Communication*. 1996;1(3):267-84. doi: <https://doi.org/10.1080/108107396128059>.
40. Maibach EW, Leiserowitz A, Roser-Renouf C, Mertz CK. Identifying Like-Minded Audiences for Global Warming Public Engagement Campaigns: An Audience Segmentation Analysis and Tool Development. *PLoS ONE*. 2011;6(3):e17571. doi: 10.1371/journal.pone.0017571.
41. Hine DW, Phillips WJ, Cooksey R, Reser JP, Nunn P, Marks ADG, et al. Preaching to different choirs: How to motivate dismissive, uncommitted, and alarmed audiences to adapt to climate change? *Global Environmental Change*. 2016;36:1-11. doi: <https://doi.org/10.1016/j.gloenvcha.2015.11.002>.
42. Hine DW, Reser JP, Morrison M, Phillips WJ, Nunn P, Cooksey R. Audience segmentation and climate change communication: conceptual and methodological considerations. *Wiley Interdisciplinary Reviews: Climate change*. 2014;5(4):441-59. doi: 10.1002/wcc.279.

43. Malek L, Umberger WJ, Goddard E. Committed vs. uncommitted meat eaters: Understanding willingness to change protein consumption. *Appetite*. 2019;138:115-26. doi: <https://doi.org/10.1016/j.appet.2019.03.024>.
44. Morgan MI, Hine DW, Bhullar N, Loi NM. Landholder adoption of low emission agricultural practices: A profiling approach. *Journal of Environmental Psychology*. 2015;41:35-44. doi: <https://doi.org/10.1016/j.jenvp.2014.11.004>.
45. Bloem S, Stalpers J, Groenland EA, van Montfort K, van Raaij WF, de Rooij K. Segmentation of health-care consumers: psychological determinants of subjective health and other person-related variables. *BMC Health Services Research*. 2020;20(1):1-12. doi: <https://doi.org/10.1186/s12913-020-05560-4>.
46. Crowley SL, Cecchetti M, McDonald RA. Diverse perspectives of cat owners indicate barriers to and opportunities for managing cat predation of wildlife. *Frontiers in Ecology and the Environment*. 2020;18(10):544-9. doi: <https://doi.org/10.1002/fee.2254>.
47. MacDonald E, Milfont T, Gavin M. What drives cat-owner behaviour? First steps towards limiting domestic-cat impacts on native wildlife. *Wildlife Research*. 2015;42(3):257-65. doi: <https://doi.org/10.1071/WR14164>
48. Foreman-Worsley R, Finka LR, Ward SJ, Farnworth MJ. Indoors or outdoors? An international exploration of owner demographics and decision making associated with lifestyle of pet cats. *Animals*. 2021;11(2):253. doi: <https://doi.org/10.3390/ani11020253>.
49. van Eeden LM, Hames F, Faulkner R, Geschke A, Squires ZE, McLeod EM. Putting the cat before the wildlife: Exploring cat owners' beliefs about cat containment as predictors of owner behavior. *Conservation Science and Practice*. 2021;3(10):e502. doi: <https://doi.org/10.1111/csp2.502>.

50. Chamberlain SAE, Mcleod LJ, Hine DW. Barriers and drivers of cat containment behavior for New Zealand cat owners. 2023. Mendeley Data, V2. doi: 10.17632/hytxh9bm8c.1.
51. Lucid. Lucid Marketplace. 2022.
52. McLeod LJ, Evans D, Jones B, Paterson M, Zito S. Understanding the relationship between intention and cat containment behaviour: a case study of kitten and cat adopters from RSPCA Queensland (Royal Society for the Prevention of Cruelty to Animals). *Animals (Basel)*. 2020;10(7). doi: 10.3390/ani10071214.
53. Toukhsati SR, Young E, Bennett PC, Coleman GJ. Wandering cats: attitudes and behaviors towards cat containment in Australia. *Anthrozoös*. 2012;25(1):61-74. doi: 10.2752/175303712X13240472427195.
54. Faul F, Erdfelder E, Lang A-G, Buchner A. G\*Power 3: A flexible statistical power analysis program for the social, behavioral, and biomedical sciences. *Behavior Research Methods*. 2007;39(2):175-91. doi: 10.3758/BF03193146.
55. Stats NZ. Ethnic group summaries reveal New Zealand's multicultural make-up. 2022, September 3.
56. Qualtrics. Survey Software. 2022.
57. Elliott A, Howell TJ, McLeod EM, Bennett PC. Perceptions of responsible cat ownership behaviors among a convenience sample of Australians. *Animals (Basel)*. 2019;9(9):703. doi: 10.3390/ani9090703.
58. Schwarz G. Estimating the dimension of a model. *The annals of statistics*. 1978:461-4.
59. Ramaswamy V, DeSarbo WS, Reibstein DJ, Robinson WT. An empirical pooling approach for estimating marketing mix elasticities with PIMS data. *Marketing Science*. 1993;12(1):103-24. doi: <https://doi.org/10.1287/mksc.12.1.103>.

60. Akaike H. Information Theory and an Extension of the Maximum Likelihood Principle. In: Parzen E, Tanabe K, Kitagawa G, editors. Selected Papers of Hirotugu Akaike: Springer 1998. p. 199-213.
61. Ferguson SL, G. Moore EW, Hull DM. Finding latent groups in observed data: A primer on latent profile analysis in Mplus for applied researchers. *International Journal of Behavioral Development*. 2020;44(5):458-68. doi: <http://dx.doi.org/10.1177/0165025419881721>.
62. Lo Y, Mendell NR, Rubin DB. Testing the number of components in a normal mixture. *Biometrika*. 2001;88(3):767-78. doi: <https://doi.org/10.1093/biomet/88.3.767>.
63. Muthén L, Muthén B. MPlus. 7.0 ed: Muthén & Muthén, Los Angeles, CA; 2022.
64. IBM. IBM SPSS statistics for Apple macOS 26 ed: IBM Corp, Armonk, NY; 2022.
65. Cohen J. *Statistical power analysis for the behavioral sciences*: Routledge; 2013.
66. Field A. *Discovering Statistics using IBM SPSS Statistic (5th ed.)*: Sage Publications; 2018.
67. Sumner CL, Walker JK, Dale AR. The implications of policies on the welfare of free-roaming cats in New Zealand. *Animals*. 2022;12(3):237. doi: <https://doi.org/10.3390/ani12030237>.
68. Dantas LM, Delgado MM, Johnson I, Buffington CT. Food puzzles for cats: feeding for physical and emotional wellbeing. *Journal of Feline Medicine and Surgery*. 2016;18(9):723-32.
69. Schoeller DA. Limitations in the assessment of dietary energy intake by self-report. *Metabolism*. 1995;44:18-22. doi: [https://doi.org/10.1016/0026-0495\(95\)90204-X](https://doi.org/10.1016/0026-0495(95)90204-X).
70. Prince SA, Adamo KB, Hamel ME, Hardt J, Gorber SC, Tremblay M. A comparison of direct versus self-report measures for assessing physical activity in adults: a

systematic review. *International Journal of Behavioral Nutrition and Physical Activity*. 2008;5(1):56. doi: 10.1186/1479-5868-5-56.

71. Wang X, Cheng Z. Cross-sectional studies: strengths, weaknesses, and recommendations. *Chest*. 2020;158(1, Supplement):S65-S71. doi: <https://doi.org/10.1016/j.chest.2020.03.012>.

## **Supporting information**

**S1 Appendix. Cat containment questionnaire**

**S2 Table. Capability, opportunity, and motivation variables and survey items**

**S3 Table. Summary of descriptive statistics for the four cat owner profiles for the capability, opportunity, and motivations (COM) factors and demographics**

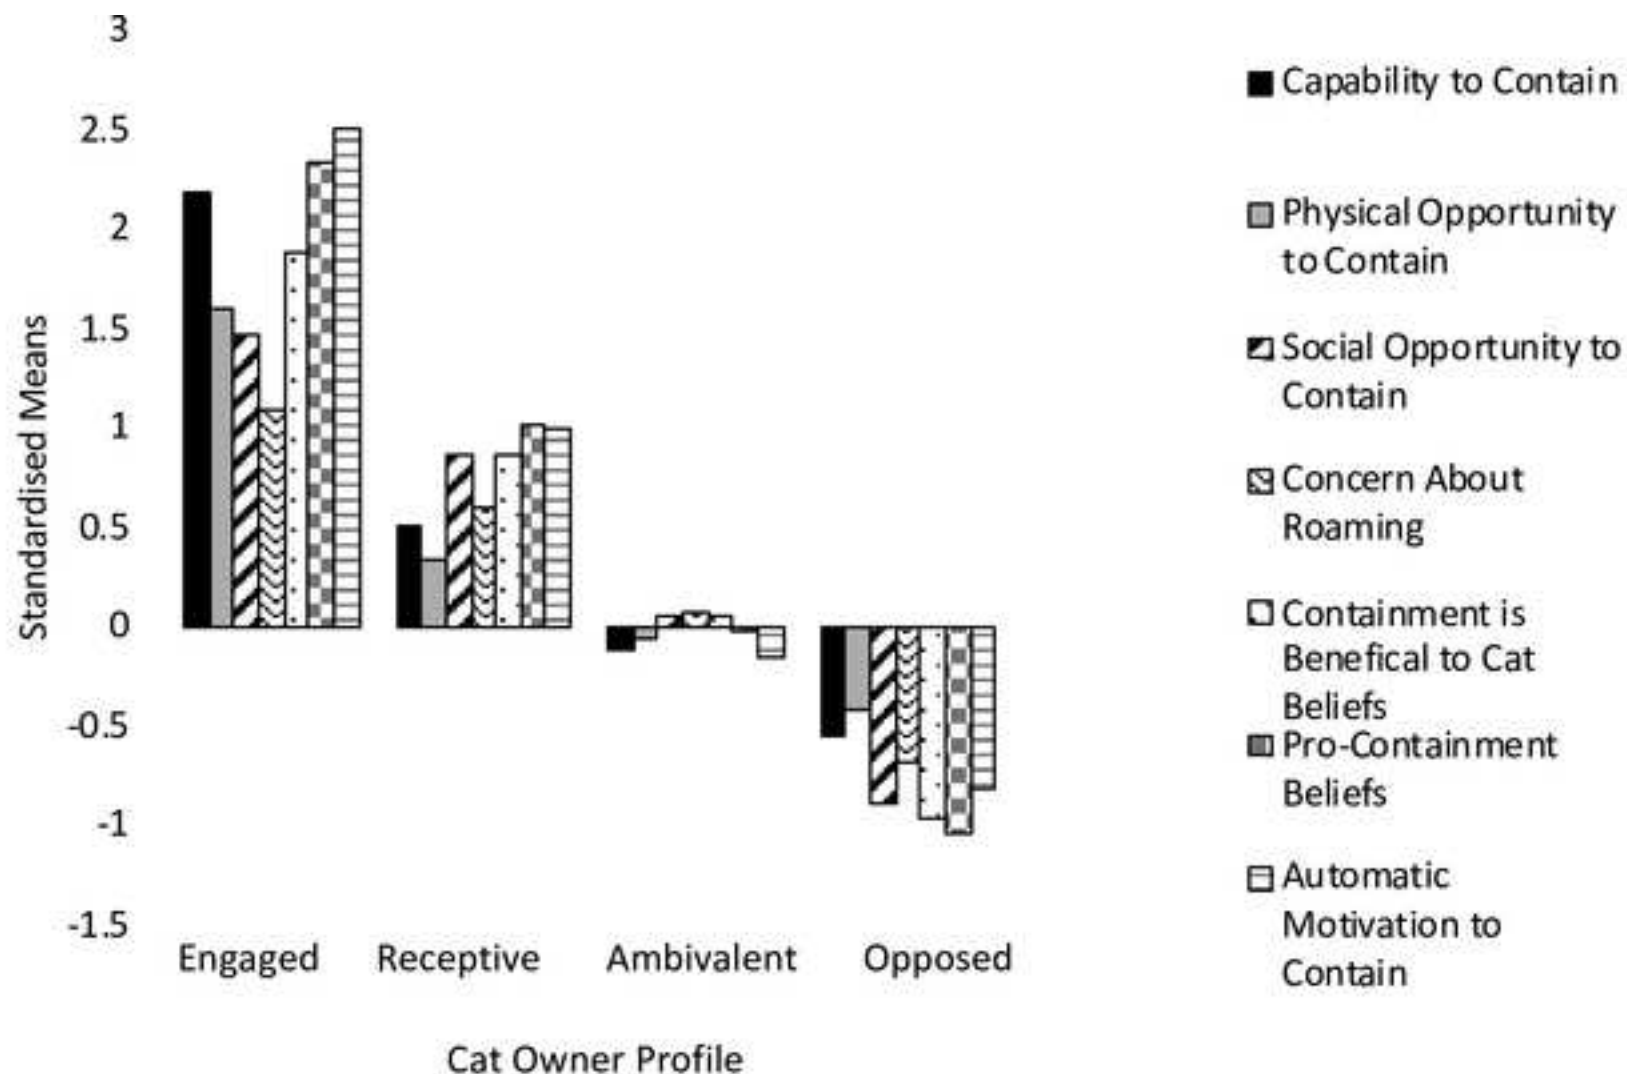

**Fig. 1. Standardized means of the capability, opportunity, and motivation factors across the four cat owner profiles.** *Notes:* Engaged,  $n = 22$ . Receptive,  $n = 68$ . Ambivalent,  $n = 188$ . Opposed,  $n = 117$ . Standardized means reflect the segment's deviation from the sample mean on the variables.

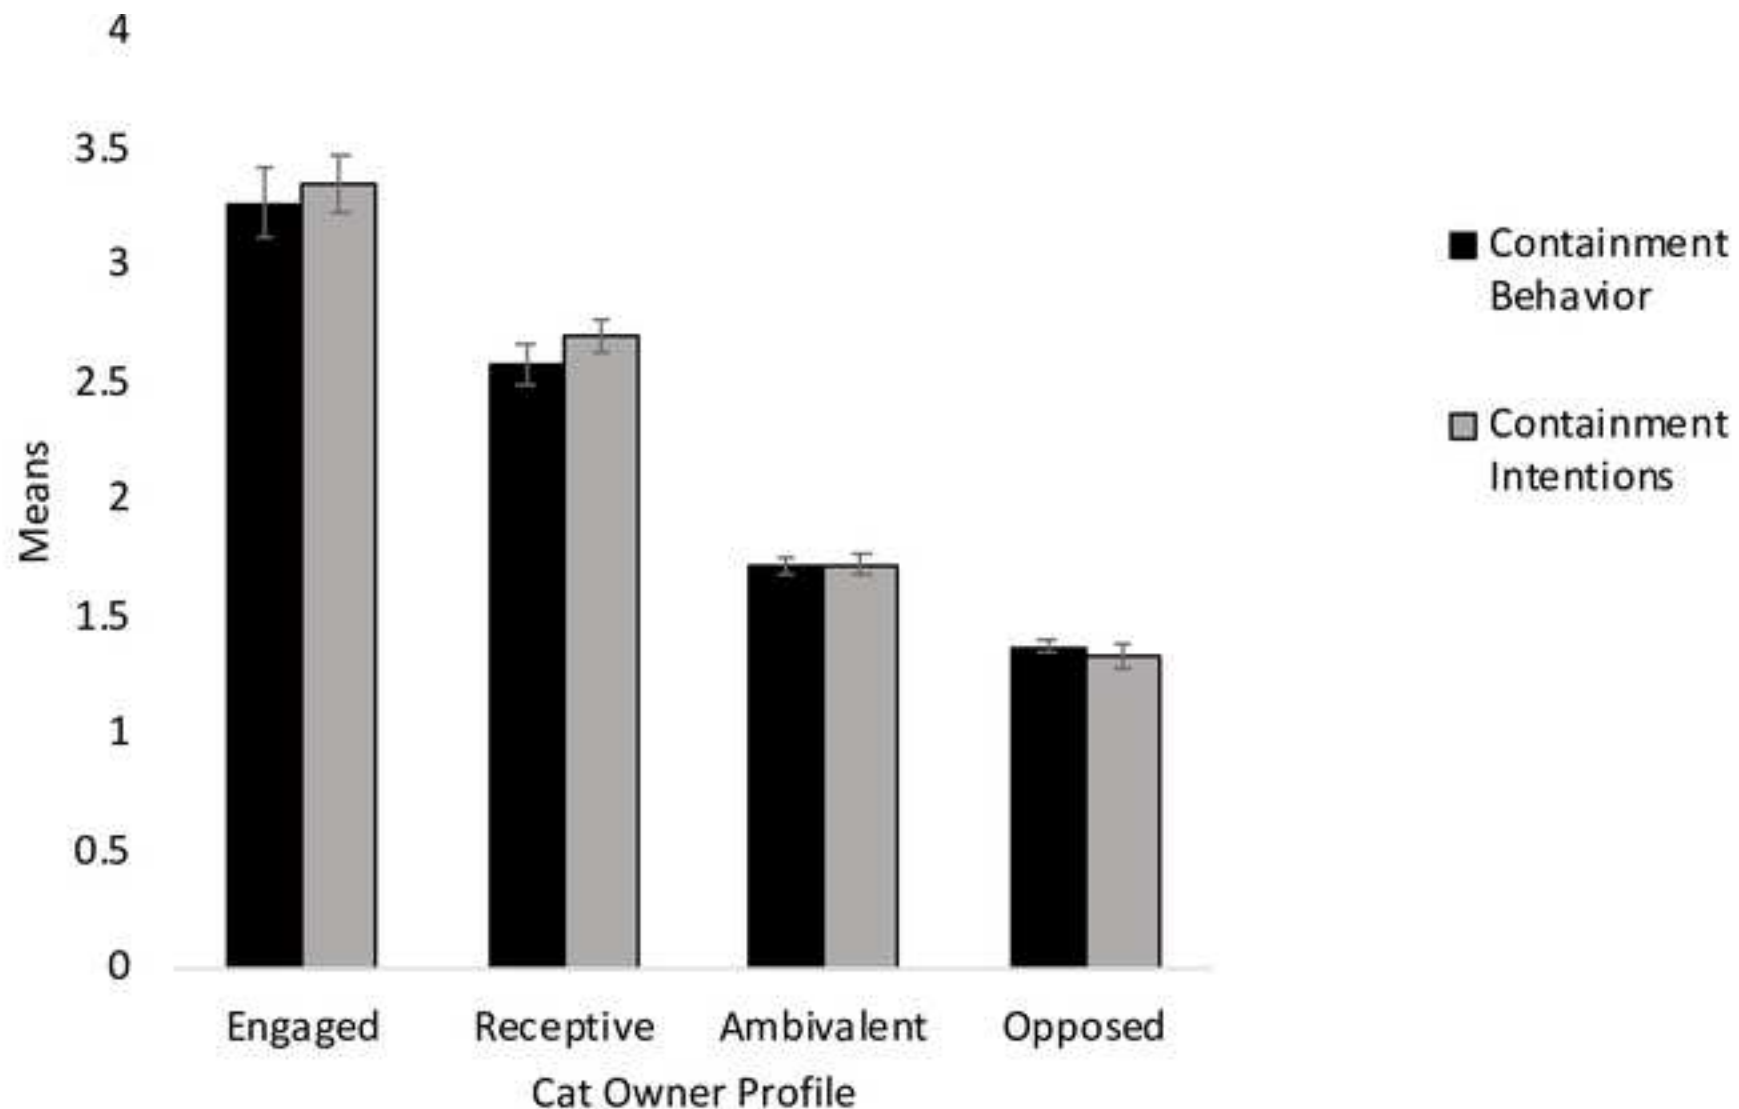

**Fig. 2. Means of the intentions and behavior variables for the four cat owner profiles.**

Notes: Engaged,  $n = 22$ . Receptive,  $n = 68$ . Ambivalent,  $n = 188$ . Opposed,  $n = 117$ . The error bars represent 95% confidence intervals. All variables ranged from a minimum 1 to maximum 5.

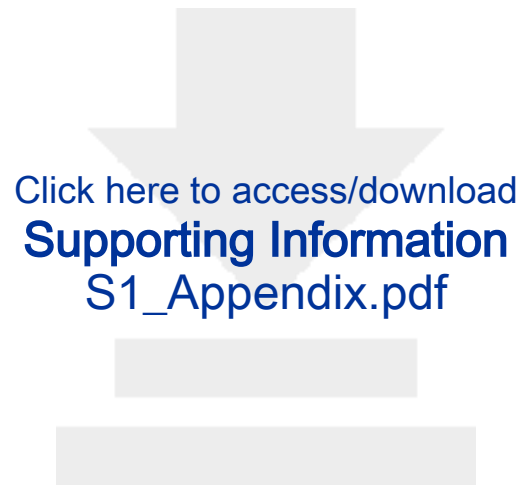

Click here to access/download  
**Supporting Information**  
S1\_Appendix.pdf



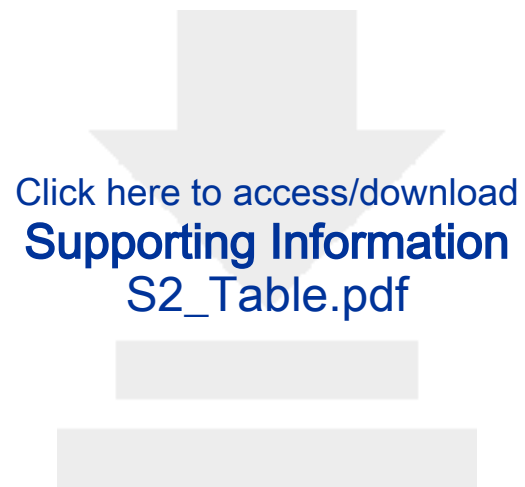

Click here to access/download  
**Supporting Information**  
S2\_Table.pdf

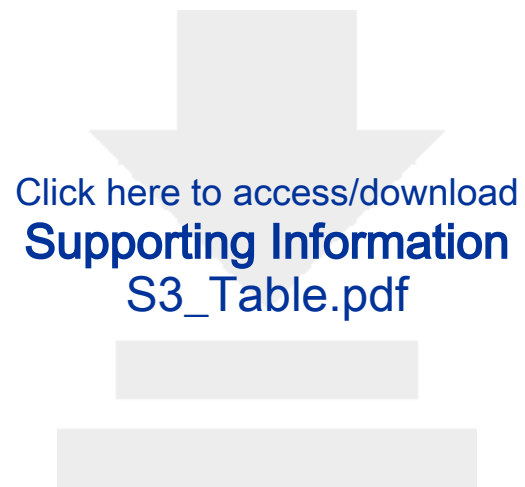

Click here to access/download  
**Supporting Information**  
S3\_Table.pdf
